# Supplementary material for: Single-Cell RNA-Seq of Bone Marrow Cells in Aplastic Anemia
Source: Front Genet. 2022 Jan 3;12:745483. doi: 10.3389/fgene.2021.745483 (PMC8762313; doi:10.3389/fgene.2021.745483)
Supplement: Supplementary file 2 [file Table3.xlsx]

## Sheet: Sheet1
supplemental Table 3 Summary statistics for the sequencing data of B cells in the four samples
Sample	Number of cells	Number of read pairs	Mean read Pairs cell	Number of cells with productive V-J Spanning pairing
AA1	408	50386866	123497	360
AA2	601	42578054	70845	838
Normal 1	428	40911424	95587	255
Normal 2	544	488204315	90756	450
